# Supplementary material for: Transcriptional mutagenesis of α-synuclein caused by DNA oxidation in Parkinson’s disease pathogenesis
Source: PubMed Central journal article supplement (PMC10564827; doi:10.1007/s00401-023-02632-7), 2023-09-23
Supplement: 401_2023_2632_MOESM2_ESM.pdf [file 401_2023_2632_MOESM2_ESM.pdf]

| Sample ID | Repository ID      | Diagnosis | Age | Sex | PMI (hours) | RIN           | Repository                | NFT Braak Stage                                | LB Braak Stage |
|-----------|--------------------|-----------|-----|-----|-------------|---------------|---------------------------|------------------------------------------------|----------------|
| C1        | PDC022             | Control   | 65  | M   | 12          | 6.5           | PD UK Brain Bank          | Not available                                  | Not available  |
| C2        | PDC035             | Control   | 89  | F   | 13          | 7.3           | PD UK Brain Bank          | Not available                                  | Not available  |
| C3        | Hct<br>ZZA_16_0001 | Control   | 89  | M   | 25.5        | 8.2           | U of Miami, Brain<br>Bank | I                                              | No LBs         |
| C4        | Hct<br>ZZR_16_0001 | AD        | 87  | M   | 10          | Not available | U of Miami, Brain<br>Bank | IV                                             | No LBs         |
| C5        | Hct<br>ZZT_16_0001 | Control   | 84  | M   | 27.5        | Not available | U of Miami, Brain<br>Bank | Neurofibrillary<br>degeneration not<br>present | No LBs         |
| C6        | Hct ZZK_16_0002    | Control   | 54  | M   | 26.5        | Not available | U of Miami, Brain<br>Bank | Neurofibrillary<br>degeneration not<br>present | No LBs         |
| C7        | Hct ZT_16_0004     | Control   | 76  | M   | 30.25       | Not available | U of Miami, Brain<br>Bank | Neurofibrillary<br>degeneration not<br>present | No LBs         |
| C8        | Hct ZZJ_16_0005    | Control   | 70  | M   | 27.2        | 8.8           | U of Miami, Brain<br>Bank | Neurofibrillary<br>degeneration not<br>present | No LBs         |
| C9        | Hct ZR_16_0006     | Control   | 76  | M   | 27.75       | Not available | U of Miami, Brain<br>Bank | II                                             | No LBs         |
| C10       | Hct YL_16_0007     | Control   | 55  | M   | 26.2        | 9.2           | U of Miami, Brain<br>Bank | Neurofibrillary<br>degeneration not<br>present | No LBs         |
| C11       | Hct YP_16_0011     | Control   | 75  | M   | 14.16       | Not available | U of Miami, Brain<br>Bank | I                                              | No LBs         |
| C12       | HSB4361            | Control   | 77  | F   | 14.7        | 5.2           | Sepulveda                 | Neurofibrillary<br>degeneration not<br>present | No LBs         |
| C13       | HSB5410            | Control   | 81  | F   | 12.5        | 7.1           | Sepulveda                 | Neurofibrillary<br>degeneration not<br>present | No LBs         |

|     |          |         |    |   |      |     |                  |                                          |        |
|-----|----------|---------|----|---|------|-----|------------------|------------------------------------------|--------|
| C14 | HSB4814  | Control | 70 | F | 16.1 | 6.6 | Sepulveda        | Neurofibrillary degeneration not present | No LBs |
| C15 | HSB4322  | Control | 88 | M | 12.4 | 6.5 | Sepulveda        | Neurofibrillary degeneration not present | No LBs |
| C16 | HSB4660  | Control | 73 | F | 18.5 | 5.6 | Sepulveda        | Neurofibrillary degeneration not present | No LBs |
| P1  | PD060    | PD      | 84 | M | 9    | 6.8 | PD UK Brain Bank | II                                       | 5      |
| P2  | PD079    | PD      | 78 | F | 22   | 7.7 | PD UK Brain Bank | I                                        | 6      |
| P3  | PD102    | PD      | 81 | M | 16   | 6.1 | PD UK Brain Bank | II                                       | 5      |
| P4  | PD104    | PD      | 75 | M | 15   | 7.1 | PD UK Brain Bank | I                                        | 5      |
| P5  | PD106    | PD      | 75 | M | 3    | 8.1 | PD UK Brain Bank | II                                       | 6      |
| P6  | HSB 4353 | PD      | 73 | M | 15   | 7.5 | Sepulveda        | Not available                            | 4      |
| P7  | HSB 4355 | PD      | 79 | M | 12.3 | 7.9 | Sepulveda        | III                                      | 6      |
| P8  | HSB 4530 | PD      | 82 | M | 13   | 5.1 | Sepulveda        | Neurofibrillary degeneration not present | 4      |
| P9  | HSB4554  | PD      | 83 | M | 6.7  | 6.7 | Sepulveda        | Neurofibrillary degeneration not present | 5      |
| P10 | HSB 4620 | PD      | 78 | M | 13   | 8.4 | Sepulveda        | III                                      | 5      |
| P11 | HSB 4653 | PD      | 87 | M | 11.2 | 6.3 | Sepulveda        | Not available                            | 5      |
| P12 | HSB 4772 | PD      | 81 | M | 7.9  | 6.5 | Sepulveda        | Neurofibrillary degeneration not present | 5      |
| P13 | HSB 4775 | PD      | 75 | M | 13.8 | 7.2 | Sepulveda        | III                                      | 6      |

|     |          |    |    |   |               |               |                               |                                          |   |
|-----|----------|----|----|---|---------------|---------------|-------------------------------|------------------------------------------|---|
| P14 | HSB 4919 | PD | 83 | M | 16.3          | 5.4           | Sepulveda                     | IV                                       | 6 |
| P15 | HSB 5181 | PD | 88 | M | Not available | Not available | Sepulveda                     | V                                        | 6 |
| P16 | HSB4884  | PD | 79 | M | 21.8          | 5.7           | Sepulveda                     | Neurofibrillary degeneration not present | 5 |
| P17 | HSB4560  | PD | 83 | F | 13.0          | 5.2           | Sepulveda                     | Not available                            | 4 |
| P18 | HSB5662  | PD | 78 | M | 11.6          | 1.1           | Sepulveda                     | II                                       | 5 |
| P19 | HSB4205  | PD | 74 | M | 11.4          | 7.7           | Sepulveda                     | II                                       | 5 |
| P20 | HSB5626  | PD | 74 | M | 26.0          | 3.0           | Sepulveda                     | I                                        | 5 |
| PD1 | S13840   | PD | 83 | F | 18.3          | Not available | Harvard Brain Tissue Resource | III                                      | 4 |
| PD2 | S07203   | PD | 80 | M | 13.42         | Not available | Harvard Brain Tissue Resource | II                                       | 4 |
| PD3 | S11972   | PD | 81 | F | 10.15         | Not available | Harvard Brain Tissue Resource | I                                        | 4 |
| PD4 | S14356   | PD | 75 | F | 7.08          | Not available | Harvard Brain Tissue Resource | II                                       | 4 |
| PD5 | S05264   | PD | 75 | M | 19.6          | Not available | Harvard Brain Tissue Resource | I                                        | 5 |
| PD6 | S10570   | PD | 88 | M | 15.92         | Not available | Harvard Brain Tissue Resource | III                                      | 4 |
| PD7 | S03822   | PD | 83 | F | 24            | Not available | Harvard Brain Tissue Resource | I                                        | 4 |
| PD8 | S06984   | PD | 71 | M | 15.67         | Not available | Harvard Brain Tissue Resource | I                                        | 4 |

| <b>CERAD</b>     | <b>Experiments</b>                            |
|------------------|-----------------------------------------------|
| Not available    | Rnase H2 PCR                                  |
| Not available    | Rnase H2 PCR                                  |
| Not available    | Rnase H2 PCR, 8-oxodG, OGG1 activity, Oxo-DIP |
| Definitie AD     | Rnase H2 PCR, 8-oxodG, OGG1 activity, Oxo-DIP |
| Criteria not met | Rnase H2 PCR, 8-oxodG, OGG1 activity, Oxo-DIP |
| Criteria not met | Rnase H2 PCR, 8-oxodG, OGG1 activity, Oxo-DIP |
| Criteria not met | Rnase H2 PCR, 8-oxodG, OGG1 activity, Oxo-DIP |
| Criteria not met | Rnase H2 PCR, 8-oxodG, OGG1 activity          |
| Criteria not met | Rnase H2 PCR, 8-oxodG, OGG1 activity, Oxo-DIP |
| Not available    | Rnase H2 PCR, 8-oxodG, OGG1 activity, Oxo-DIP |
| Criteria not met | Rnase H2 PCR, 8-oxodG, OGG1 activity          |
| Not available    | Rnase H2 PCR                                  |
| Not available    | Rnase H2 PCR                                  |

|               |                                               |
|---------------|-----------------------------------------------|
| Not available | Rnase H2 PCR                                  |
| Not available | Rnase H2 PCR                                  |
| Not available | Rnase H2 PCR                                  |
| Not available | Rnase H2 PCR                                  |
| Not available | Rnase H2 PCR                                  |
| Not available | Rnase H2 PCR                                  |
| Not available | Rnase H2 PCR                                  |
| Not available | Rnase H2 PCR, 8-oxodG, OGG1 activity, Oxo-DIP |
| Probable AD   | Rnase H2 PCR, 8-oxodG, OGG1 activity, Oxo-DIP |
| Not available | Rnase H2 PCR, 8-oxodG, OGG1 activity, Oxo-DIP |
| Not available | Rnase H2 PCR, 8-oxodG, OGG1 activity, Oxo-DIP |
| Probable AD   | Rnase H2 PCR, 8-oxodG, OGG1 activity, Oxo-DIP |
| Not available | Rnase H2 PCR, 8-oxodG, OGG1 activity, Oxo-DIP |
| Not available | Rnase H2 PCR, 8-oxodG, OGG1 activity, Oxo-DIP |
| Definite AD   | Rnase H2 PCR, 8-oxodG, OGG1 activity, Oxo-DIP |
