# Supplementary material for: Transcriptional mutagenesis of α-synuclein caused by DNA oxidation in Parkinson’s disease pathogenesis
Source: PubMed Central journal article supplement (PMC10564827; doi:10.1007/s00401-023-02632-7), 2023-09-23
Supplement: 401_2023_2632_MOESM3_ESM.pdf [file 401_2023_2632_MOESM3_ESM.pdf]

|          | Forward RH Primers Gen 2                         | Tm (°C) |
|----------|--------------------------------------------------|---------|
| L38I Wt  | 5' -GAAAGACAAAAGAGGGTGTTrCT/iSpC3/iSpC3/CG-3'    | 55.8    |
| L38I     | 5' -GAAAGACAAAAGAGGGTGTTrAT/iSpC3/iSpC3/CG-3'    | 53.8    |
| S42Y Wt  | 5' -AGGGTGTTCCTCTATGTAGGCTrCC/iSpC3/iSpC3/AT-3'  | 59.2    |
| S42Y     | 5' -AGGGTGTTCCTCTATGTAGGCTrAC/iSpC3/iSpC3/AT-3'  | 57.6    |
| H50N Wt  | 5' -AAACCAAGGAGGGAGTGGTGrCA/iSpC3/iSpC3/TT-3'    | 61.1    |
| H50N     | 5' -AAACCAAGGAGGGAGTGGTGrAA/iSpC3/iSpC3/TT-3'    | 58.9    |
| A53E Wt  | 5' -GGAGTGGTGCATGGTGTGGrCA/iSpC3/iSpC3/AT-3'     | 62.5    |
| A53E     | 5' -GGAGTGGTGCATGGTGTGGrAA/iSpC3/iSpC3/AT-3'     | 60.3    |
| T72K Wt  | 5' -TGTTGGAGGAGCAGTGGTGA rCG/iSpC3/iSpC3/GT-3'   | 64.1    |
| T72K     | 5' -TGTTGGAGGAGCAGTGGTGA rAG/iSpC3/iSpC3/GT-3'   | 61.7    |
| T75K Wt  | 5' -AGCAGTGGTGACGGGTGTGA rCA/iSpC3/iSpC3/GT-3'   | 64.8    |
| T75K     | 5' -AGCAGTGGTGACGGGTGTGA rAA/iSpC3/iSpC3/GT-3'   | 62.8    |
| S129Y Wt | 5' -CAATGAGGCTTATGAAATGCCTTrCT/iSpC3/iSpC3/GC-3' | 58.4    |
| S129Y    | 5' -CAATGAGGCTTATGAAATGCCTTrAT/iSpC3/iSpC3/GC-3' | 56.7    |
|          |                                                  |         |
|          | Reverse Primers                                  |         |
| RP#1     | 5' -TCTTGCCCCAACTGGTCCTTT-3'                     | 59.2    |
| RP#2     | 5' -TCCACAGGCATATCTTCCAGAAT-3'                   | 58.3    |

| Amplicon size (bp)             |
|--------------------------------|
| 216 with RP#1<br>265 with RP#2 |
| 204 with RP#1<br>253 with RP#2 |
| 180 with RP#1<br>229 with RP#2 |
| 169 with RP#1<br>218 with RP#2 |
| 113 with RP#1<br>162 with RP#2 |
| 104 with RP#1<br>153 with RP#2 |
| 92 with RP#3<br>219 with RP#4  |
|                                |
|                                |
|                                |
| with RP#1 plus 49              |
