# Supplementary material for: Transcriptional mutagenesis of α-synuclein caused by DNA oxidation in Parkinson’s disease pathogenesis
Source: PubMed Central journal article supplement (PMC10564827; doi:10.1007/s00401-023-02632-7), 2023-09-23
Supplement: 401_2023_2632_MOESM4_ESM.pdf [file 401_2023_2632_MOESM4_ESM.pdf]

| <b>TM position</b> | <b>TANGO aggregation score</b> | <b>Familial Mutations</b> | <b>TANGO aggregation score</b> |
|--------------------|--------------------------------|---------------------------|--------------------------------|
| A11D               | 895.362                        | WT                        | 896.077                        |
| A17D               | 838.552                        | WT 1-120                  | 925.632                        |
| A18D               | 838.552                        | A18T                      | 881.034                        |
| A19D               | 839.535                        | A29S                      | 895.558                        |
| T22N               | 895.275                        | A30P                      | 896.077                        |
| Q24K               | 899.266                        | E46K                      | 901.432                        |
| A27E               | 896.077                        | H50Q                      | 949.801                        |
| A29E               | 896.077                        | G51D                      | 879.360                        |
| A30E               | 896.077                        | A53T                      | 882.468                        |
| T33K               | 899.787                        | A53E                      | 844.942                        |
| L38I               | 975.842                        |                           |                                |
| S42Y               | 1053.170                       |                           |                                |
| T44N               | 894.376                        |                           |                                |
| H50N               | 943.487                        |                           |                                |
| A53E               | 844.942                        |                           |                                |
| T54K               | 848.246                        |                           |                                |
| A56D               | 843.752                        |                           |                                |
| T59N               | 895.661                        |                           |                                |
| Q62K               | 907.763                        |                           |                                |
| T64K               | 873.526                        |                           |                                |
| A69E               | 905.445                        |                           |                                |
| T72K               | 412.038                        |                           |                                |
| T75K               | 440.083                        |                           |                                |
| A76E               | 447.175                        |                           |                                |
| A78D               | 653.024                        |                           |                                |
| Q79K               | 730.061                        |                           |                                |
| T81K               | 896.937                        |                           |                                |
| A85E               | 901.350                        |                           |                                |
| A89E               | 896.259                        |                           |                                |
| A90E               | 893.840                        |                           |                                |
| Q99K               | 899.724                        |                           |                                |
| A107D              | 896.077                        |                           |                                |
| P108T              | 896.077                        |                           |                                |
| Q109K              | 899.731                        |                           |                                |
| L113M              | 896.077                        |                           |                                |
| P117H              | 896.955                        |                           |                                |
| P120H              | 896.955                        |                           |                                |
| A124D              | 896.077                        |                           |                                |
| P128T              | 896.077                        |                           |                                |
| S129Y              | 896.077                        |                           |                                |
| Q134K              | 899.731                        |                           |                                |
| P138T              | 896.070                        |                           |                                |
| A140D              | 896.070                        |                           |                                |
